# Supplementary material for: Estimating the population size of female sex workers and transgender women in Sri Lanka
Source: PLoS One. 2020 Jan 15;15(1):e0227689. doi: 10.1371/journal.pone.0227689 (PMC6961924; doi:10.1371/journal.pone.0227689)
Supplement: S2 File — (XLSX) [file pone.0227689.s002.xlsx]

## Sheet: MAPPING_FSW_L2_24_01_results
province	district1	district2	district3	district4	district5	district6	district7	district8	divisional.secretariat1	divisional.secretariat2	divisional.secretariat3	divisional.secretariat4	divisional.secretariat5	divisional.secretariat6	divisional.secretariat7	divisional.secretariat8	divisional.secretariat9	divisional.secretariat10	divisional.secretariat11	divisional.secretariat12	divisional.secretariat13	divisional.secretariat14	divisional.secretariat15	divisional.secretariat16	divisional.secretariat17	divisional.secretariat18	spot.type.code	validation	section2	spot.active	visit	section3	spot.type.field	spot.type.field.other	peak.day	peak.time	low.estimate	high.estimate	fsw.other.spots	fsw.number.spots	number.month.low	number.month.high	added low	added high	average estimate	MOBILITY	Av n spots visited	Aver adjust est mob	Low adj est mob
6						12														35							11	1		1	1		11		6	2	3	5	2		3	5					Kandy: 186/360, 52.3 (47.2, 57.4)
6						12														35							4	2		1	1		4		7	2	5	12	3		6	14					Kandy	47.7
6						12														35							5	1		1	1		5		6	1	2	2	1	2	3	2
6						12														35							4	2		1	1		4		7	2	5	10	3		5	12
6						12														35							1	1		1	1		1		6	2	5	15	2		4	16
6						12														35							4	2		1	1		4		1	2	2	3	3		2	3
6						12														35							11	2		1	1		11		6	2	3	5	3		3	5
6						12														35							1	1		1	1		1		6	2	10	15	2		10	15
6						12														35							11	1		1	1		11		7	2	2	3	2		2	3	38	75	56.5	0.111111	1.11111	55.935	37.62
8								16																42			2	1		1	1		2		6	3	10	15	1	2	10	15
8								16																42			11	2		1	1		11		6	2	4	5	3		4	6
8								16																42			11	1		1	1		11		7	2	3	5	2		3	7
8								16																42			11	1		1	1		11		6	2	10	12	2		10	12
8								16																42			11	1		1	1		11		6	2	6	10	2		10	12
8								16																42			11	1		1	1		11		7	2	4	5	2		4	7
8								16																42			11	1		1	1		11		6	3	5	7	2		4	9
8								16																42			11	1		1	1		11		1	2	4	5	2		3	7
8								16																42			11	1		1	1		11		7	2	4	5	2		4	6
8								16																42			11	1		1	1		11		1	2	3	5	2		2	7
8								16																42			11	1		1	1		11		7	2	5	7	2		4	9
8								16																42			1	2		1	1		1		3	2	8	10	3		10	15
8								16																42			11	1		1	1		11		6	3	6	8	2		6	8
8								16																42			4	2		1	1		4		6	2	3	5	3		3	5
8								16																42			4	1		1	1		4		1	2	2	3	3		2	5
8								16																42			11	1		1	1		11		6	2	4	5	2		4	6
8								16																42			1	2		1	1		1		6	3	3	5	3		2	8
8								16																42			1	2		1	1		1		7	2	2	5	3		2	6
8								16																42			1	1		1	1		1		7	2	4	5	2		4	8
8								16
8								16																42			11	1		1	1		11		6	2	5	7	2		4	8
8								16																42			4	2		1	1		4		7	2	3	5	3		2	7
8								16																42			11	1		1	1		11		7	2	4	5	2		3	8	100	181	140.5	0.0454545	1.04545	140.5	100
8								16																43			1	2		1	1		1		6	3	3	5	3		3	6
8								16																43			1	2		1	1		1		6	3	4	5	3		4	5
8								16																43			1	2		1	1		1		7	3	3	4	3		3	4
8								16																43			1	2		1	1		1		7	3	4	5	3		4	5
8								16																43			11	1		1	1		11		1	2	3	5	2		3	6
8								16																43			11	1		1	1		11		6	2	3	4	2		3	5
8								16																43			11	1		1	1		11		7	2	3	4	2		3	4
8								16																43			1	2		1	1		1		6	3	3	4	3		3	4
																								43			11	1		1	1		11		1	2	5	7	2		5	7	31	46	38.5			38.5	31
5					10													29									4	2		1	1		4		7	2	3	4	3		3	4
5					10													29									1	2		1	1		1		6	2	1	1	3		1	1
5					10													29									1	2		1	1		1		4	2	2	3	3		2	3
5					10													29									1	1		1	1		1		7	2	2	3	2		2	3
5					10													29									6	1		1	1		77	Housing village	6	2	10	15	1	1	10	15
5					10													29									10	2		1	1		10		7	2	1	1	3		1	1
5					10													29									1	1		1	1		1		7	3	3	5	1	1	3	5
5					10													29									1	1		1	1		1		7	1	4	5	2		4	5
5					10													29									1	2		1	1		1		5	2	2	2	3		2	2
																		29									1	2		1	1		1		7	3	7	8	3		7	8	35	47	41	0.2	1.2	39.6333	33.8333
5					10													30									1	2		1	1		1		6	2	3	5	3		3	5
5					10													30									77	2		1	1		1		7	2	5	7	3		5	7
5					10													30									1	1		1	1		1		6	2	2	3	1	1	2	3
5					10													30									5	2		1	1		5		5	3	3	3	3		3	3	13	18	15.5	0.25	1.25	14.6058	12.35
1	1								2																		5	1		1	2		5		3	2	3	4	2		3	4		4
1	1								2																		5	2		1	2		5		3	1	2	3	3		2	3		3
1	1								2																		5	2		1	2		5		3	2	2	3	2		2	3		3
1	1								2																		5	2		1	2		5		3	2	1	2	3		1	2		2
1	1								2																		5	2		1	2		5		4	3	1	2	3		1	2		2
1	1								2																		5	2		1	2		5		2	2	2	3	3		2	3		3
1	1								2																		5	2		1	2		5		3	1	1	2	3		1	2		2
1	1								2																		5	2		1	2		5		5	2	1	1	3		1	1		1
1	1								2																		5	2		1	2		5		3	2	1	2	3		1	2		2
1	1								2																		5	2		1	2		5		4	2	1	2	3		1	3		3
1	1								2																		5	2		1	2		5		4	2	1	2	3		1	3	16	28	22			22	16
1	1								1																		5	2		1	1		5		3	2	3	4	3		3	4
1	1								1																		4	2		1	2		4		5	2	2	3	3		2	3
1	1								1																		4	2		1	2		4		5	2	2	3	3		2	4
1	1								1																		5	2		1	2		5		4	3	3	4	3		3	4
1	1								1																		4	2		1	2		4		3	2	3	4	3		3	4
1	1								1																		4	2		1	2		4		3	1	2	3	3		2	3
1	1								1																		5	2		1	2		5		3	1	1	2	3		1	2
1	1								1																		5	2		1	2		5		5	2	5	6	3		5	6
1	1								1																		5	2		1	2		5		5	2	5	6	3		5	6
1	1								1																		5	2		1	2		5		3	1	5	6	3		5	6	31	42	36.5			36.5	31
8								16																41			6	1		1	1		6		6	4	10	12	2		9	15
8								16																41			1	1		1	1		1		6	3	4	5	2		7	8	16	23	19.5			19.5	16
8								16																44			7	1		1	1		7		7	3	8	10	2		12	15
8								16																44			6	1		1	1		6		6	3	5	6	1	2	8	10
8								16																44			1	2		1	1		1		6	2	3	4	3		4	5
8								16																44			1	1		1	1		1		7	3	8	10	2		10	15
8								16																44			6	1		1	1		6		4	2	12	15	1	1	15	20
8								16																44			1	2		1	1		1		7	2	6	8	3		8	10
8								16																44			11	2		1	1		11		7	2	3	4	3		5	6
8								16																44			11	2		1	1		11		7	2	3	4	3		4	5
8								16																44			11	2		1	1		11		7	2	3	4	3		5	6
8								16																44			6	1		1	1		6		6	3	3	4	1	1	5	6
8								16																44			6	1		1	1		6		5	2	3	4	1	1	4	5
8								16																44			1	1		1	1		1		7	3	5	6	2		8	10
8								16																44			11	2		1	2		1		6	2	3	4	3		4	5
8								16																44			1	1		1	1		1		6	3	6	7	2		8	10
8								16																44			11	1		1	1		11		5	2	6	7	2		8	10
8								16																44			11	2		1	1		11		7	2	3	4	3		4	5
8								16																44			7	1		1	1		7		7	2	2	3	2		4	5
8								16																44			1	1		1	1		1		1	3	6	7	2		8	10
8								16																44			11	2		1	1		11		7	2	2	3	3		3	4
8								16																44			11	2		1	1		11		6	2	3	4	3		4	6
8								16																44			1	1		1	1		1		7	3	8	10	2		10	15
8								16																44			11	2		1	1		11		7	2	6	8	3		8	10
8								16																44			1	1		1	1		1		6	3	8	10	2		10	15
8								16																44			11	1		1	1		11		7	2	3	4	2		5	6
8								16																44			11	2		1	1		11		6	2	6	7	3		6	10
8								16																44			6	1		1	1		6		7	3	15	18	2		20	25
8								16																44			11	2		1	1		11		6	2	5	6	2		8	10
8								16																44			1	2		1	1		1		6	3	3	4	3		5	6
8								16																44			11	1		1	1		11		7	2	6	8	2		10	12
8								16																44			11	2		1	1		11		1	2	6	8	2		8	10
8								16																44			3	1		1	1		3		1	3	6	7	2		8	10
8								16																44			8	2		1	1		8		6	4	8	10	3		10	15
8								16																44			8	2		1	1		8		6	4	6	8	3		8	10
8								16																44			11	2		1	1		11		7	2	2	3	3		2	3
8								16																44			1	2		1	1		1		7	3	3	4	3		4	5
8								16																44			11	1		1	1		11		7	2	6	7	2		8	10
8								16																44			11	2		1	1		11		7	2	3	4	3		4	5
8								16																44			1	1		1	1		1		6	3	6	8	2		8	10
8								16																44			6	1		1	1		6		7	3	6	8	2		10	12	283	367	325	0.102564	1.10256	322.045	280.427
8								16																42			11	1		1	1		11		4	2	4	5	2		5	7	5	7	6			6	5
4				7											17												5	1		1	1		5		5	2	1	2	2		1	2
4				7											17												5	1		1	1		5		6	2	5	7	2		4	8	5	10	7.5			7.5	5
																								41			11	1		1	1		11		1	2	2	3	2		3	4
8								16																41			11	1		1	1		11		5	2	4	5	2		5	6
8								16																41			1	1		1	1		1		6	3	10	15	1	1	15	20
8								16																41			1	1		1	1		1		6	4	10	12	2		12	15
8								16																41			1	1		1	1		1		6	3	5	10	1	1	10	12
8								16																41			1	1		1	1		1		5	3	10	15	2		15	20
8								16																41			1	1		1	1		1		7	3	8	10	1	1	10	15
8								16																41			1	1		1	1		1		5	2	4	5	2		8	10
8								16																41			1	1		1	1		1		6	2	3	4	2		3	5
8								16																41			1	1		1	1		1		4	3	8	10	2		10	15
8								16																41			1	1		1	1		1		4	3	8	10	1	1	10	12
8								16																41			1	1		1	1		1		6	3	8	10	2		10	15
8								16																41			1	1		1	1		1		5	3	10	15	2		15	20
8								16																41			1	1		1	1		1		5	4	3	4	2		4	5
8								16																41			1	1		1	1		1		6	4	6	8	2		8	10
8								16																41			1	1		1	1		1		4	1	6	7	1	1	8	18
8								16																41			1	1		1	1		1		5	3	3	4	2		4	5
8								16																41			6	1		1	1		6		4	3	8	10	2		10	12
8								16																41			1	1		1	1		1		6	4	8	10	2		10	15
8								16																41			1	1		1	2		1		4	4	8	10	2		10	15
8								16																41			1	1		1	2		1		4	4	6	8	2		8	10
8								16																41			1	1		1	1		1		5	4	6	8	2		8	10
8								16																41			1	1		1	1		1		6	4	6	7	2		6	10
8								16																41			1	1		1	1		1		1	3	5	6	2		8	10
8								16																41			1	1		1	1		1		6	3	8	10	2		10	15
8								16																41			1	1		1	1		1		7	3	12	15	2		15	20
8								16																41			1	1		1	1		1		6	3	12	15	1	1	20	25
8								16																41			1	1		1	1		1		4	4	12	16	2		15	20
8								16																41			4	1		1	1		4		6	2	6	8	2		8	10
8								16																41			1	1		1	1		1		6	4	6	8	1	1	8	10
8								16																41			4	2		1	2		4		6	2	6	8	3		8	10
8								16																41			6	1		1	2		6		4	2	3	5	2		5	7
8								16																41			4	1		1	1		4		6	3	4	6	2		5	8
8								16																41			11	1		1	1		11		6	2	3	4	2		4	5
8								16																41			1	2		1	2		1		5	4	3	4	3		3	5
8								16																41			1	1		1	1		1		6	4	8	10	1	1	10	12
8								16																41			77	1		1	1		4		7	2	6	8	2		8	10
8								16																41			1	1		1	1		1		5	3	4	5	1	1	5	7
8								16																41			4	1		1	1		77	Lodge	6	2	6	8	2		8	10
8								16																41			1	1		1	1		1		6	4	4	5	2		5	7
8								16																41			11	1		1	1		11		6	2	2	3	2		2	3
8								16																41			1	1		1	1		1		7	4	10	12	2		12	18
8								16																41			7	1		1	1		7		6	4	4	5	2		5	7
8								16																41			6	1		1	1		6		5	4	13	15	1	1	17	20
8								16																41			6	1		1	1		1		7	2	6	8	2		8	10
8								16																41			6	1		1	1		6		6	4	5	6	2		6	8
8								16																41			6	1		1	1		6		6	3	8	10	2		10	12
8								16																41			6	1		1	1		6		5	4	10	15	2		12	20
8								16																41			1	2		1	2		1		7	4	3	4	3		4	5
8								16																41			6	1		1	1		6		1	4	6	8	2		8	10
8								16																41			6	1		1	1		6		6	3	6	8	2		7	10
8								16																41			1	2		1	2		1		6	3	2	3	3		3	4
8								16																41			1	1		1	1		1		3	4	4	5	1	1	5	6
8								16																41			6	1		1	2		6		3	3	4	5	1	1	6	8
8								16																41			2	1		1	2		2		7	2	3	4	2		5	6
8								16																41			11	1		1	1		11		7	2	3	4	2		4	5
8								16																41			6	1		1	1		6		6	3	4	5	1	1	6	8
8								16																41			11	1		1	1		11		7	2	3	4	2		5	6
8								16																41			11	1		1	2		11		7	2	3	4	3		5	6
8								16																41			3	1		1	1		3		6	2	6	8	2		8	10
8								16																41			11	1		1	1		11		7	2	2	3	2		4	5
8								16																41			1	1		1	1		1		6	3	2	4	2		5	6
8								16																41			6	1		1	1		6		5	3	3	4	1	1	6	8
8								16																41			6	1		1	1		6		5	3	4	5	2		8	10
8								16																41			6	1		1	1		6		7	3	5	7	1	1	8	10
8								16																41			6	1		1	1		6		7	4	4	6	1	1	8	10
8								16																41			6	1		1	1		6		7	4	8	10	2		10	15
8								16																41			1	1		1	1		1		6	4	2	3	2		3	4	537	720	628.5	0.216216	1.21622	607.55	519.1
5					9												25										4	1		1	1		4		6	4	4	5	2		4	5
5					9												25										1	1		1	2		1		6	2	6	7	1	1	6	7
5					9												25										1	1		1	2		1		6	2	3	4	1	2	4	5
5					9												25										1	1		1	2		1		6	2	4	5	1	2	4	5
5					9												25										4	1		1	1		4		7	3	4	5	2		4	5
5					9												25										1	1		1	1		1		7	2	4	5	1	1	4	5
5					9												25										4	1		1	1		4		1	3	3	5	2		4	5
5					9												25										4	1		1	1		4		7	2	4	5	2		4	5
5					9												25										4	1		1	1		4		7	2	2	3	2		2	3
5					9												25										4	1		1	1		4		7	2	4	5	2		4	5
5					9												25										6	2		1	2		6		6	2	4	5	3		4	5
5					9												25										4	1		1	1		4		6	3	2	3	2		2	3
5					9												25										6	1		1	2		6		7	3	4	5	2		4	5	50	63	56.5	0.307692	1.46154	39.6615	45
5					9												26										4	1		1	1		4		7	3	4	5	2		4	5
5					9												26										4	1		1	1		4		7	3	3	4	2		4	5
5					9												26										4	1		1	1		4		7	2	6	8	2		6	8
5					9												26										4	1		1	1		4		1	2	4	5	2		4	5
5					9												26										4	1		1	1		4		1	3	4	5	2		4	5
5					9												26										1	2		1	2		1		7	3	5	6	3		5	6
5					9												26										1	1		1	2		1		6	2	6	8	2		6	8
5					9												26										6	2		1	2		6		7	3	8	10	3		8	10
5					9												26										1	1		1	2		1		7	2	4	5	1	1	5	6	46	58	52	0.111111	1.11111	51.5273	45.5818
7							14															39					1	1		1	2		1		6	2	6	7	1	2	6	7
7							14															39					1	1		1	2		1		6	2	6	7	1	2	6	7
7							14															39					4	1		1	1		4		7	4	4	5	2		4	5
7							14															39					1	1		1	2		1		6	2	4	5	1	1	4	5
7							14															39					1	1		1	2		1		1	2	5	6	1	1	5	6
7							14															39					1	1		1	2		1		1	2	8	10	1	1	8	10
7							14															39					1	1		1	2		1		6	2	5	6	1	1	5	6
7							14															39					4	1		1	1		4		7	3	4	5	2		4	5
7							14															39					4	1		1	1		4		6	3	5	6	2		5	6
7							14															39					4	1		1	1		4		5	4	3	4	2		3	4
7							14															39					1	1		1	2		1		6	2	4	5	1	1	4	5
7							14															39					1	1		1	2		1		7	2	4	5	1	2	4	5
7							14															39					1	1		1	2		1		6	2	4	5	1	1	4	5
7							14															39					1	1		1	2		1		6	2	3	4	1	2	4	5
7							14															39					11	1		1	1		11		1	2	4	5	2		4	5
7							14															39					11	1		1	1		11		7	2	3	4	2		3	4
7							14															39					11	1		1	1		11		7	2	4	5	2		4	5	77	95	86	0.588235	1.82353	63.0667	56.4667
8								18																		49	11	1		1	1		11		6	2	1	2	2		1	2
8								18																		49	11	1		1	1		11		6	2	2	4	2		3	4
8								18																		49	11	1		1	1		11		6	2	3	4	2		4	5
8								18																		49	11	1		1	1		11		6	2	1	2	2		1	2
8								18																		49	11	1		1	1		11		6	2	1	2	2		1	2
8								18																		49	11	1		1	1		11		6	2	2	3	2		2	3
8								18																		49	1	1		1	1		1		7	2	4	5	1	1	4	5
8								18																		49	1	1		1	2		1		6	2	6	8	1	1	6	8
8								18																		49	1	2		1	2		1		1	2	2	3	3		2	3	24	34	29	0.222222	1.22222	28.0333	23.2
4				7											16												4	1		1	1		4		6	2	2	3	2		2	3
4				7											16												1	1		1	2		1		1	2	3	4	1	1	3	4
4				7											16												1	1		1	2		1		6	2	4	5	1	2	4	5
4				7											16												1	1		1	2		1		6	2	2	3	1	2	3	4
4				7											16												1	1		1	2		1		6	2	2	3	1	2	3	4	15	20	17.5	0.8	2.4	9.33333	8
6						11													32								1	1		1	2		1		6	2	4	5	1	2	4	5
6						11													32								11	1		1	1		11		7	3	2	3	2		2	3
6						11													32								11	1		1	1		11		6	2	2	3	2		2	3
6						11													32								11	1		1	1		11		6	2	4	5	2		4	5
6						11													32								11	1		1	1		11		6	2	4	5	2		4	5
6						11													32								11	1		1	1		11		6	2	3	5	2		3	5
6						11													32								11	1		1	1		11		7	2	2	3	2		2	3
6						11													32								11	1		1	1		11		7	2	1	2	2		1	2
6						11													32								11	1		1	1		11		6	2	8	10	2		8	10
6						11													32								11	1		1	1		11		7	2	4	5	2		4	5
6						11													32								11	1		1	1		11		7	2	4	5	2		4	5
6						11													32								3	1		1	2		3		6	3	7	8	1	2	8	10
6						11													32								1	1		1	2		1		6	2	4	5	1	2	4	5	53	69	61	0.428571	1.42857	54.0286	46.9429
8								16																45			1	1		1	1		1		7	3	6	7	2		8	10
8								16																45			4	1		1	1		4		6	2	2	3	2		3	4
8								16																45			7	1		1	1		7		6	3	1	2	2		2	3
8								16																45			77	1		1	1		77	Village	7	2	8	10	1	1	10	15
8								16																45			1	1		1	1		1		7	3	8	10	1	2	12	15	35	47	41	0.4	1.6	34.85	29.75
8								16																42			11	1		1	1		11		6	2	3	4	2		4	5
8								16																42			11	1		1	1		11		1	2	3	4	2		4	5
8								16																42			11	1		1	1		11		6	3	4	5	2		6	8
8								16																42			1	1		1	1		1		4	3	4	5	1	1	6	8
8								16																42			1	1		1	1		1		7	2	3	4	1	1	5	6
8								16																42			6	1		1	1		6		7	3	3	4	1	1	5	6
8								16																42			11	1		1	1		11		7	2	3	4	2		4	5
8								16																42			1	1		1	1		1		6	2	2	3	1	1	4	5	38	48	43	0.5	1.5	35.8333	31.6667
8								17																	47		11	1		1	1		11		7	2	3	4	2		4	5
8								17																	47		11	1		1	1		11		7	2	2	3	2		3	4
8								17																	47		1	1		1	1		1		7	3	5	7	1	1	8	10
8								17																	47		5	1		1	1		5		7	3	6	8	2		10	12
8								17																	47		11	1		1	1		11		7	2	2	3	2		2	3
8								17																	47		5	1		1	1		5		7	3	2	3	2		4	5
8								17																	47		5	2		1	1		5		7	3	3	4	3		6	7
8								17																	47		1	1		1	1		1		7	3	3	4	2		4	5
8								17																	47		1	2		1	1		1		7	3	3	4	3		5	6
8								17																	47		11	1		1	1		11		7	3	2	3	2		3	4
8								17																	47		11	1		1	1		11		7	2	3	4	2		4	5
8								17																	47		1	2		1	1		1		6	3	3	4	3		4	5
8								17																	47		7	1		1	1		7		6	2	3	4	2		4	5
8								17																	47		11	1		1	1		11		7	2	2	3	2		4	5
8								17																	47		1	1		1	1		1		6	3	2	3	2		4	5
8								17																	47		1	1		1	1		1		7	3	6	7	1	1	8	10
8								17																	47		2	1		1	1		2		7	3	8	12	1	1	10	15
8								17																	47		1	1		1	1		1		7	3	6	7	2		8	10
8								17																	47		1	1		1	1		1		7	3	3	4	1	1	5	6	100	127	113.5	0.157895	1.15789	109.717	96.6667
8								17																	46		5	1		1	1		7		7	2	2	3	2		3	4
8								17																	46		4	1		1	2		4		1	3	4	5	2		4	5
8								17																	46		1	2		1	2		1		1	2	2	3	3		3	4
8								17																	46		6	1		1	2		6		6	3	5	6	1	1	6	8
8								17																	46		1	1		1	1		1		6	3	6	8	1	1	8	10
8								17																	46		5	1		1	2		5		6	3	8	10	2		8	10
8								17																	46		77	1		1	2		77	Boarding house	7	3	5	6	2		5	6
8								17																	46		1	1		1	2		1		7	3	2	3	1	1	2	3
8								17																	46		11	1		1	1		11		6	3	4	5	2		4	5
8								17																	46		8	1		1	2		1		7	3	8	10	1	1	8	10
8								17																	46		8	1		1	2		8		7	4	15	20	2		15	20
8								17																	46		1	2		1	2		1		7	3	4	5	3		4	5
8								17																	46		11	1		1	1		11		1	3	3	4	2		3	4
8								17																	46		4	1		1	1		4		7	3	4	5	2		4	5
8								17																	46		1	1		1	2		1		7	3	6	8	1	1	6	8
8								17																	46		5	2		1	2		77	Boarding house	7	3	8	10	2		8	10
8								17																	46		11	1		1	1		11		7	3	3	4	2		4	5
8								17																	46		11	1		1	1		11		1	3	3	4	2		3	4
8								17																	46		1	2		1	2		1		6	3	2	3	3		3	4
8								17																	46		1	2		1	2		1		7	4	6	7	3		6	7
8								17																	46		1	2		1	2		1		7	4	5	6	3		5	6
8								17																	46		1	1		1	2		1		7	3	5	6	2		5	6
8								17																	46		8	1		1	2		8		6	4	8	10	2		8	10
8								17																	46		6	2		1	2		6		7	3	8	10	3		8	10
8								17																	46		1	1		1	2		1		6	2	8	10	1	1	8	10
8								17																	46		4	1		1	1		4		6	3	5	6	2		5	6
8								17																	46		11	1		1	1		11		6	2	4	5	2		4	5
8								17																	46		1	2		1	2		1		6	3	5	6	3		5	6	155	196	175.5	0.214286	1.21429	169.65	149.833
4				7											15												4	1		1	1		4		6	3	8	10	2		8	10
4				7											15												4	1		1	1		4		6	3	4	5	2		4	5
4				7											15												4	1		1	1		4		6	3	2	3	2		2	3
4				7											15												1	1		1	2		1		6	2	6	8	1	1	8	10
4				7											15												1	1		1	1		1		6	2	15	20	1	1	15	20
4				7											15												11	1		1	1		11		6	3	4	5	2		4	5
4				7											15												11	1		1	1		11		6	3	4	5	2		4	5
4				7											15												11	1		1	1		11		7	3	8	10	2		8	10
4				7											15												4	1		1	1		4		7	3	8	10	2		8	10
4				7											15												11	1		1	1		11		7	3	4	5	2		4	5
4				7											15												11	1		1	1		11		7	3	3	4	2		3	4
4				7											15												3	2		1	2		3		7	2	6	8	3		6	8	74	95	84.5	0.166667	1.16667	67.6278	71.5333
8								17																	48		1	1		1	1		1		6	4	8	10	1	1	10	14
8								17																	48		1	1		1	1		1		3	4	4	5	2		8	10
8								17																	48		4	1		1	1		4		6	3	4	5	2		6	7
8								17																	48		7	1		1	1		7		6	4	4	5	2		6	8
8								17																	48		11	1		1	1		11		6	3	4	5	2		6	8
8								17																	48		11	1		1	1		11		6	3	5	6	2		6	8
8								17																	48		11	1		1	1		11		6	3	6	8	2		8	10
8								17																	48		1	1		1	1		1		1	4	5	6	1	1	6	7
4				7
4				7
4				7
4				7
8								17																	48		5	1		1	1		5		4	3	8	10	2		10	12
8								17																	48		1	1		1	1		1		1	4	8	10	2		10	12
8								17																	48		1	2		1	1		1		7	4	4	5	2		6	8
8								17																	48		1	1		1	1		1		6	4	8	10	1	1	10	12
8								17																	48		1	1		1	1		1		5	4	4	5	1	1	6	7
8								17																	48		10	1		1	1		10		6	3	4	5	2		6	7
8								17																	48		1	1		1	1		1		7	3	5	6	2		6	7
8								17																	48		11	1		1	1		11		6	3	4	5	2		6	7	116	144	130	0.25	1.25	91.0577	107.969
5					9												27										11	1		1	1		11		6	3	4	5	2		6	7
5					9												27										1	1		1	1		1		1	4	6	7	2		8	10
5					9												27										1	1		1	1		1		1	4	3	4	1	1	4	5
5					9												27										6	1		1	1		6		6	4	8	10	2		9	12
5					9												27										4	1		1	1		4		6	4	6	7	2		8	9
5					9												27										4	1		1	1		4		6	4	2	3	2		3	4
5					9												27										6	1		1	1		6		6	4	4	5	2		5	6
5					9												27										4	1		1	1		4		6	4	4	5	2		5	6
5					9												27										6	1		1	1		6		1	4	4	5	2		6	7	54	66	60	0.111111	1.11111	54.0101	53.5091
5					9												28										4	1		1	1		4		7	4	3	4	2		4	5	4	5	4.5			4.5	4
6						12														36							4	1		1	1		4		7	2	3	4	2		3	4
6						12														36							4	1		1	2		4		6	2	2	3	2		2	3
6						12														36							4	1		1	2		4		6	2	2	3	2		1	3
4				8												20											1	1		1	2		1		6	2	4	5	1	1	3	6	3	6	4.5	1	2	0.5	1.5
4				8												19											1	1		1	1		1		6	2	2	3	1	1	2	4
4				8												19											4	2		1	1		4		6	2	4	5	3		3	4
4				8												19											1	1		1	2		1		6	2	4	5	1	1	4	5
4				8												19											1	1		1	2		1		6	2	3	4	1	1	3	4
4				8												19											4	1		1	2		4		6	2	5	6	2		5	6
4				8												19											1	1		1	2		1		6	2	4	5	1	1	3	5	20	28	24	0.666667	1.66667	7.47451	14.2353
4				8												22											1	2		1	2		1		5	2	4	5	3		3	5
4				8												22											5	2		1	2		5		6	2	2	3	3		2	3
4				8												21											1	2		1	2		1		6	2	2	3	3		1	3
4				8												21											1	2		1	2		1		1	1	2	3	3		2	3
4				8												21											1	2		1	2		1		1	1	2	3	3		1	3	9	17	13			13	9
6						11													34								1	2		1	2		1		6	2	2	3	2		2	3
6						11													33								1	2		1	2		1		7	2	2	3	3		2	3	4	6	5			5	4
5					9												24										11	1		1	1		11		7	2	2	3	2		3	5
5					9												24										1	1		1	2		1		6	2	2	3	1	1	2	3
5					9												24										1	1		1	2		1		6	2	2	3	2		4	5
5					9												24										1	2		1	2		1		1	2	2	3	3		4	5
5					9												24										1	1		1	2		1		6	2	2	3	1	1	4	5
5					9												24										4	1		1	1		4		7	2	3	4	2		5	6
5					9												24										4	1		1	2		4		7	2	4	5	2		3	6
5					9												24										1	1		1	1		1		6	2	7	9	1	1	7	10
5					9												24										1	2		1	2		1		7	2	2	3	3		3	4
5					9												24										1	2		1	2		1		6	2	2	3	3		1	3	36	52	44	0.3	1.3	30.8692	33.5077
3			6											11													1	1		1	2		1		7	2	4	5	1	1	3	7
3			6											11													1	1		1	1		1		2	2	4	5	1	1	3	7	6	14	10	1	2	0.5	3
8								16																41			6	1		1	1		6		5	4	12	15	1	1	15	18
8								16																41			6	1		1	1		6		6	4	6	8	2		8	10
8								16																41			6	1		1	1		6		7	3	15	20	1	1	20	25
8								16																41			6	1		1	1		6		7	4	17	20	2		20	25
8								16																41			1	1		1	1		1		6	4	4	5	1	1	5	6
8								16																41			6	1		1	1		6		7	3	8	10	2		10	12
8								16																41			1	1		1	1		1		5	4	4	5	2		5	6
8								16																41			6	1		1	1		6		4	4	4	5	1	1	3	7
8								16																41			11	2		1	2		11		7	2	3	4	3		4	5
8								16																41			1	1		1	1		1		6	4	10	12	2		12	15
8								16																41			11	2		1	1		11		5	2	2	3	3		2	3
8								16																41			11	1		1	1		11		1	2	2	3	2		3	4
8								16																41			6	1		1	1		6		6	3	3	4	2		4	5
8								16																41			7	1		1	1		7		7	3	3	4	2		4	5
8								16																41			1	1		1	1		1		1	3	10	12	1	1	12	15
8								16																41			1	1		1	1		1		6	3	6	8	2		8	10
8								16																41			11	1		1	1		11		7	2	5	6	2		6	8
8								16																41			8	2		1	1		8		1	4	15	20	2		20	25	161	204	182.5	0.277778	1.27778	169.865	149.854
6						13															37						1	1		1	1		1		6	2	4	5	2		4	5
6						13															37						5	2		1	2		5		7	3	1	2	2		1	2
6						13															37						5	2		1	2		5		1	2	1	2	2		1	2
6						13															37						1	1		1	1		1		6	2	2	3	2		2	3
6						13															37						5	1		1	1		5		7	2	1	1	2		1	1
6						13															38						1	1		1	1		1		7	2	5	6	2		5	6
6						13															38						4	2		1	2		4		7	2	2	3	3		5	6	19	25	22			22	19
7							15																40				1	1		1	2		1		7	2	1	1	2		1	1
7							15																40				1	2		1	2		1		7	2	10	12	3		8	12
7							15																40				4	2		1	2		4		7	4	3	4	3		2	4
7							15																40				6	1		1	1		6		7	2	5	6	2		4	5
7							15																40				1	1		1	1		1		7	2	4	5	2		4	5
7							15																40				6	1		1	1		6		7	2	4	5	2		3	5
7							15																40				5	1		1	1		5		7	3	3	4	2		3	4
7							15																40				1	1		1	1		1		7	3	7	8	2		5	8
7							15																40				6	1		1	1		6		7	2	4	5	2		3	5
7							15																40				5	1		1	1		5		7	3	1	1	2		1	1
7							15																40				5	1		1	1		5		7	2	1	2	2		1	2
7							15																40				4	2		1	2		4		7	3	2	3	3		2	3
7							15																40				6	1		1	2		6		7	3	1	2	2		1	2	38	57	47.5			47.5	38
3			5										10														1	1		1	2		1		6	2	2	3	2		4	5	4	5	4.5			4.5	4
2		2								4																	1	2		1	2		1		7	2	3	4	3		2	5
2		2								4																	4	2		1	1		4		1	2	2	3	3		3	4
2		2								4																	4	2		1	2		4		7	2	2	3	3		3	5
2		2								4																	1	1		1	2		1		7	2	4	5	2		5	7
2		2								4																	4	2		1	2		4		7	2	1	2	3		1	2	14	23	18.5			18.5	14
2		2								3																	5	2		1	2		5		7	2	5	6	3		7	9
2		2								3																	1	2		1	2		1		7	3	2	3	2		3	4
2		2								3																	5	2		1	2		5		7	2	2	3	3		3	5
2		2								5																	5	1		1	2		5		1	2	1	2	2		2	3
2		2								5																	5	2		1	1		5		7	2	1	1	2		1	1
2		2								5																	5	1		1	2		5		6	2	2	3	2		3	5	19	27	23			23	19
2		4										9															5	2		1	1		5		7	2	2	3	3		2	5
2		3									7																5	2		1	1		5		7	2	2	3	3		2	4	4	9	6.5			6.5	4
2		3									8																4	1		1	2		4		7	2	2	3	2		3	5
2		3									8																4	2		1	2		4		1	2	2	3	3		2	3
2		3									8																77	2		1	2		77	Colony	5	2	2	3	3		3	5
2		3									8																77	2		1	2		77	Colony	7	2	2	4	3		3	6
2		3									8																5	2		1	2		5		1	2	1	2	3		1	2
2		3									8																77	2		1	2		77	Colony	7	2	5	6	3		6	8	18	29	23.5			23.5	18
2		3									6																2	1		1	2		2		7	2	2	3	1	1	3	5
2		3									6																1	1		1	1		1		6	2	2	3	1	1	3	5
2		3									6																1	1		1	1		1		7	2	2	3	1	1	2	5
2		3									6																1	1		1	2		1		1	2	2	3	1	1	3	4
2		3									6																1	1		1	1		1		7	2	2	3	1	1	3	5
2		3									6																77	2		1	2		77	Colony	6	2	5	6	3		6	9
2		3									6																1	2		1	1		1		7	2	2	3	3		4	5
2		3									6																1	1		1	1		1		6	2	6	7	2		5	10
2		3									6																4	2		1	1		4		6	2	2	3	3		4	5
2		3									6																1	2		1	1		1		7	2	2	3	2		3	4
2		3									6																1	1		1	1		1		1	2	3	4	1	1	4	6
2		3									6																4	2		1	2		4		7	3	2	4	3		3	4
2		3									6				14												4	1		1	1		4		7	3	2	3	2		2	3	45	70	57.5	0.461538	1.46154	47.9167	37.5
															14												1	1		1	1		1		6	2	7	8	1	1	7	8
															14												6	2		1	2		6		7	2	6	7	3		6	7
															14												6	2		1	2		6		6	2	4	5	3		4	5	19	23	21	0.25	1.25	19.5462	17.6846
[truncated: 6 more columns]
